# Supplementary material
Source: PubMed Central journal article supplement (PMC8591275)
Supplement: AJUM-24-225-s002.pdf [file AJUM-24-225-s002.pdf]

Table 1 Reporting Practices for Additional Doppler Measures

|                                                                               | Obstetric Practice AU <sup>†</sup> | Obstetric Practice NZ <sup>‡</sup> | Radiology Practice AU | Radiology Practice NZ | TOTAL N (%) |
|-------------------------------------------------------------------------------|------------------------------------|------------------------------------|-----------------------|-----------------------|-------------|
|                                                                               | N                                  | N                                  | N                     | N                     |             |
| <b>DV<sup>§</sup> Doppler performed: 123/123</b>                              |                                    |                                    |                       |                       |             |
| In all third trimester US                                                     | 3                                  | 0                                  | 6                     | 0                     | 9 (7)       |
| All third trimester US <32w                                                   | 1                                  | 0                                  | 0                     | 0                     | 1 (1)       |
| All third trimester US <34w                                                   | 5                                  | 0                                  | 0                     | 0                     | 5 (4)       |
| Never performed                                                               | 26                                 | 3                                  | 2                     | 0                     | 31 (25)     |
| When EFW <sup>¶</sup> <5 <sup>th</sup> percentile                             | 3                                  | 0                                  | 0                     | 0                     | 3 (2)       |
| When EFW<10 <sup>th</sup> percentile                                          | 5                                  | 2                                  | 0                     | 0                     | 5 (4)       |
| When UA <sup>‡</sup> Doppler abnormal                                         | 5                                  | 3                                  | 0                     | 1                     | 8 (7)       |
| When MCA <sup>#</sup> Doppler abnormal                                        | 4                                  | 2                                  | 0                     | 4                     | 10 (8)      |
| When UA & MCA Doppler abnormal                                                | 9                                  | 3                                  | 0                     | 2                     | 14 (11)     |
| EFW<10 <sup>th</sup> percentile & abnormal UA Doppler, MCA Doppler, or both   | 14                                 | 1                                  | 0                     | 0                     | 15 (12)     |
| EFW<5 <sup>th</sup> percentile & abnormal UA & MCA Doppler                    | 11                                 | 2                                  | 0                     | 0                     | 13 (11)     |
| For other conditions                                                          | 8                                  | 1                                  | 0                     | 0                     | 9 (7)       |
| <b>Doppler index/indices reported: 92/93 (31 never performed DV Doppler)</b>  |                                    |                                    |                       |                       |             |
| SD <sup>§§</sup>                                                              | 5                                  | 0                                  | 0                     | 0                     | 5 (5)       |
| PI <sup>¶¶</sup>                                                              | 10                                 | 10                                 | 1                     | 4                     | 25 (27)     |
| RI <sup>‡‡</sup>                                                              | 2                                  | 0                                  | 0                     | 0                     | 2 (2)       |
| PVIV <sup>‡‡</sup>                                                            | 18                                 | 1                                  | 0                     | 1                     | 20 (22)     |
| PI & A-wave                                                                   | 4                                  | 1                                  | 0                     | 1                     | 6 (7)       |
| PVIV & A-wave                                                                 | 5                                  | 0                                  | 0                     | 0                     | 5 (5)       |
| A-wave                                                                        | 16                                 | 1                                  | 2                     | 0                     | 19 (21)     |
| Other                                                                         | 6                                  | 1                                  | 3                     | 1                     | 10 (11)     |
| <b>DV Doppler chart: 93/93</b>                                                |                                    |                                    |                       |                       |             |
| Unsure                                                                        | 34                                 | 11                                 | 4                     | 2                     | 51 (55)     |
| Kessler <sup>1</sup>                                                          | 7                                  | 2                                  | 0                     | 5                     | 14 (15)     |
| Hecher <sup>2</sup>                                                           | 6                                  | 1                                  | 0                     | 0                     | 7 (8)       |
| Turan <sup>3</sup>                                                            | 2                                  | 0                                  | 0                     | 0                     | 2 (2)       |
| Baschat <sup>4</sup>                                                          | 1                                  | 0                                  | 0                     | 0                     | 1 (1)       |
| No chart – A-wave only                                                        | 14                                 | 2                                  | 2                     | 0                     | 18 (19)     |
| <b>UtA<sup>§§§</sup> Doppler performed: 122/123</b>                           |                                    |                                    |                       |                       |             |
| In all third trimester scans                                                  | 4                                  | 0                                  | 0                     | 0                     | 4 (3)       |
| Never performed in third trimester                                            | 51                                 | 7                                  | 6                     | 3                     | 67 (55)     |
| When EFW<5 <sup>th</sup> percentile                                           | 4                                  | 1                                  | 0                     | 0                     | 5 (4)       |
| When EFW<10 <sup>th</sup> percentile                                          | 9                                  | 4                                  | 1                     | 1                     | 14 (11)     |
| Risk of FGR <sup>¶¶¶</sup>                                                    | 8                                  | 2                                  | 1                     | 0                     | 11 (9)      |
| Other                                                                         | 14                                 | 3                                  | 0                     | 3                     | 20 (16)     |
| <b>Doppler index/indices reported: 60/63 (60 never performed UtA Doppler)</b> |                                    |                                    |                       |                       |             |
| PI                                                                            | 24                                 | 9                                  | 1                     | 5                     | 39 (65)     |
| RI                                                                            | 4                                  | 0                                  | 0                     | 0                     | 4 (7)       |
| SD                                                                            | 4                                  | 0                                  | 0                     | 0                     | 4 (7)       |
| Presence of diastolic notch                                                   | 3                                  | 0                                  | 0                     | 0                     | 3 (5)       |
| Co-reporting of indices                                                       | 5                                  | 1                                  | 1                     | 2                     | 10 (17)     |
| <b>UtA Doppler chart: 61/63</b>                                               |                                    |                                    |                       |                       |             |
| Unsure                                                                        | 25                                 | 4                                  | 0                     | 2                     | 31 (51)     |
| Gomez <sup>5</sup>                                                            | 7                                  | 5                                  | 2                     | 5                     | 18 (30)     |
| Achayra                                                                       | 6                                  | 1                                  | 0                     | 0                     | 7 (11)      |
| Geipel <sup>6</sup>                                                           | 1                                  | 0                                  | 0                     | 0                     | 1 (1)       |
| Kaminopetros <sup>7</sup>                                                     | 1                                  | 0                                  | 0                     | 0                     | 1 (1)       |
| Merz <sup>8</sup>                                                             | 1                                  | 0                                  | 0                     | 0                     | 1 (1)       |
| Schaffer (unpublished)                                                        | 1                                  | 0                                  | 0                     | 0                     | 1 (1)       |

† Australia

‡ New Zealand

§ ductus venosus

¶ estimated fetal weight

‡ umbilical artery

# middle cerebral artery

§§ systolic diastolic ratio

¶¶ pulsatility index

‡‡ resistive index

‡‡‡ pulsatility index for veins

§§§ uterine artery

¶¶¶ fetal growth restriction

## References

1. Kessler J, Rasmussen S, Hanson M, Kiserud T. Longitudinal reference ranges for ductus venosus flow velocities and waveform indices. *Ultrasound in obstetrics & gynecology*. 2006;28(7):890-8.
2. Hecher K, Campbell S, Snijders R, Nicolaides K. Reference ranges for fetal venous and atrioventricular blood flow parameters. *Ultrasound in Obstetrics and Gynecology: The Official Journal of the International Society of Ultrasound in Obstetrics and Gynecology*. 1994;4(5):381-90.
3. Turan OM, Turan S, Sanapo L, Wilruth A, Berg C, Gembruch U, et al. Reference ranges for ductus venosus velocity ratios in pregnancies with normal outcomes. *Journal of Ultrasound in Medicine*. 2014;33(2):329-36.
4. Baschat AA. Relationship between placental blood flow resistance and precordial venous Doppler indices. *Ultrasound in Obstetrics & Gynecology*. 2003;22(6):561-6.
5. Gómez O, Figueras F, Fernández S, Bennasar M, Martínez J, Puerto B, et al. Reference ranges for uterine artery mean pulsatility index at 11–41 weeks of gestation. *Ultrasound in Obstetrics and Gynecology: The Official Journal of the International Society of Ultrasound in Obstetrics and Gynecology*. 2008;32(2):128-32.
6. Geipel A, Hennemann F, Fimmers R, Willruth A, Lato K, Gembruch U, et al. Reference ranges for Doppler assessment of uterine artery resistance and pulsatility indices in dichorionic twin pregnancies. *Ultrasound in obstetrics & gynecology*. 2011;37(6):663-7.
7. Kaminopetros P, Higuera M, Nicolaides K. Doppler study of uterine artery blood flow: comparison of findings in the first and second trimesters of pregnancy. *Fetal diagnosis and therapy*. 1991;6(1-2):58-64.
8. Merz E. *Ultrasound in Obstetrics and Gynecology Vol.1*. 2 ed. Stuttgart New York: Thieme; 2005.
